# Supplementary material for: Deep learning for detecting and characterizing oil and gas well pads in satellite imagery
Source: PubMed Central journal article supplement (PMC11327246; doi:10.1038/s41467-024-50334-9), 2024-08-15
Supplement: 41467_2024_50334_MOESM1_ESM.pdf [file 41467_2024_50334_MOESM1_ESM.pdf]

## Supplementary Information for

### **Deep learning for detecting and characterizing oil and gas well pads in satellite imagery**

Neel Ramachandran, Jeremy Irvin, Mark Omara, Ritesh Gautam, Kelsey Meisenhelder, Erfan Rostami, Hao Sheng, Andrew Y. Ng, Robert B. Jackson

#### **This PDF file includes:**

Supplementary Table 1 to 12

Supplementary Fig. 1 to 8

Supplementary Note 1

**Supplementary Table 1.** Validation set results across several architectures and backbones for the well pad detection model. The highest-performing model, shown in bold, was selected for the basin-scale deployments. The results are reported as the mean and standard deviation (SD) across 10 runs.

| Architecture | Backbone        | Average Precision (Mean $\pm$ SD)   |
|--------------|-----------------|-------------------------------------|
| SSD          | VGG-16          | 0.844 $\pm$ 0.003                   |
| YoloV3       | DarkNet-53      | 0.834 $\pm$ 0.004                   |
|              | ResNet-50       | <b>0.980 <math>\pm</math> 0.001</b> |
| RetinaNet    | ResNet-101      | 0.971 $\pm$ 0.002                   |
|              | ResNeXt-101     | 0.972 $\pm$ 0.002                   |
|              | RegNetX-3.2GF   | 0.973 $\pm$ 0.002                   |
|              | ResNest-50      | 0.953 $\pm$ 0.002                   |
|              | Res2Net-101     | 0.923 $\pm$ 0.002                   |
|              | EfficientNet-b3 | 0.972 $\pm$ 0.002                   |
|              | ResNet-50       | 0.974 $\pm$ 0.003                   |
| FasterRCNN   | ResNet-101      | 0.970 $\pm$ 0.002                   |
|              | ResNeXt-101     | 0.970 $\pm$ 0.003                   |
|              | RegNetX-3.2GF   | 0.972 $\pm$ 0.002                   |
|              | ResNest-50      | 0.974 $\pm$ 0.002                   |
|              | Res2Net-101     | 0.977 $\pm$ 0.001                   |

**Supplementary Table 2.** Validation set results across several backbones for the well pad verification model. The highest-performing model, shown in bold, was selected for the basin-scale deployments.

| Backbone        | Overall F1   |
|-----------------|--------------|
| Inception-v3    | 0.993        |
| ResNet-50       | 0.996        |
| ResNet-101      | 0.996        |
| ResNeXt-101     | 0.997        |
| DenseNet-121    | 0.998        |
| EfficientNet-b3 | <b>0.999</b> |

**Supplementary Table 3:** Validation set results in the Permian and Denver basins with the standalone detection model, and with the detection and verification models (i.e. the full detection pipeline). We note that the Average Precision of the former cannot be fairly compared to the latter: Any falsely unverified true positives are filtered out by the verification model, introducing an upper bound on achievable recall which penalizes Average Precision at high thresholds. Thus, we only use precision and recall at a single threshold to evaluate the verified detection predictions. The results are reported as the mean and standard deviation (SD) across 10 runs.

|         |                                   | Precision (Mean $\pm$ SD)           | Recall (Mean $\pm$ SD) |
|---------|-----------------------------------|-------------------------------------|------------------------|
| Permian | Detection Model                   | 0.962 $\pm$ 0.004                   | 0.932 $\pm$ 0.001      |
|         | Detection and Verification Models | <b>0.975 <math>\pm</math> 0.002</b> | 0.932 $\pm$ 0.003      |
| Denver  | Detection Model                   | 0.937 $\pm$ 0.007                   | 0.895 $\pm$ 0.001      |
|         | Detection and Verification Models | <b>0.946 <math>\pm</math> 0.004</b> | 0.895 $\pm$ 0.005      |

**Supplementary Table 4. Validation set results (Average Precision) of the well pad detection model.** Comparison of models trained in individual basins compared to the model jointly trained in both basins (bold), which achieves the highest performance. The results are reported as the mean and standard deviation (SD) across 10 runs.

| Validation Set |                                     |                                     |
|----------------|-------------------------------------|-------------------------------------|
| Training Set   | Permian (Mean $\pm$ SD)             | Denver (Mean $\pm$ SD)              |
| Permian        | 0.986 $\pm$ 0.001                   | 0.872 $\pm$ 0.007                   |
| Denver         | 0.861 $\pm$ 0.003                   | 0.963 $\pm$ 0.004                   |
| Both           | <b>0.990 <math>\pm</math> 0.001</b> | <b>0.969 <math>\pm</math> 0.003</b> |

**Supplementary Table 5: Well pad detection model performance and dataset counts in the evaluation basins.** Results from the Permian/Denver test set (from Table 1) are shown for comparison. We note that the results shown in the evaluation basins were produced solely by the detection model, as the verification model did not improve model performance, while the results shown in the Permian/Denver regions leverage the verification model. As such, Average Precision cannot fairly be compared between the Permian/Denver regions and the evaluation basins and is not presented here (see Supplementary Table 3). The results are reported as the mean and standard deviation (SD) across 10 runs.

| Basin          | Precision<br>(Mean $\pm$ SD) | Recall<br>(Mean $\pm$ SD) | # Positive<br>Images | # Negative<br>Images |
|----------------|------------------------------|---------------------------|----------------------|----------------------|
| Permian/Denver | 0.955 $\pm$ 0.004            | 0.904 $\pm$ 0.006         | 1,202                | 7,764                |
| Appalachian    | 0.647 $\pm$ 0.031            | 0.552 $\pm$ 0.020         | 574                  | 4,111                |
| TX-LA-MS Salt  | 0.866 $\pm$ 0.016            | 0.806 $\pm$ 0.014         | 614                  | 4,045                |
| Anadarko       | 0.906 $\pm$ 0.016            | 0.856 $\pm$ 0.019         | 676                  | 4,121                |
| Uinta-Piceance | 0.948 $\pm$ 0.009            | 0.943 $\pm$ 0.010         | 625                  | 4,329                |

**Supplementary Table 6. Percent of total area covered by acquisition year for the Google Earth satellite basemap in the Permian and Denver basins.**

| Year | % Total Area Covered |        |
|------|----------------------|--------|
|      | Permian              | Denver |
| 2013 | 0                    | 19.30  |
| 2014 | 0.04                 | 0.31   |
| 2015 | 0.34                 | 16.55  |
| 2016 | 9.30                 | 32.40  |
| 2017 | 21.65                | 0.43   |
| 2018 | 21.00                | 0.50   |
| 2019 | 47.66                | 30.50  |

**Supplementary Table 7. Validation set results across several architectures and backbones for the storage tank detection model.** The highest-performing model, shown in bold, was selected for the basin-scale deployments.

| Architecture | Backbone        | Average Precision |
|--------------|-----------------|-------------------|
| SSD          | VGG-16          | 0.969             |
| YoloV3       | DarkNet-53      | 0.973             |
| RetinaNet    | ResNet-50       | 0.955             |
|              | ResNet-101      | 0.599             |
|              | ResNeXt-101     | 0.957             |
|              | RegNetX-3.2GF   | 0.952             |
|              | ResNest-50      | 0.312             |
|              | Res2Net-101     | 0.954             |
|              | EfficientNet-b3 | 0.952             |
|              | FasterRCNN      | ResNet-50         |
| FasterRCNN   | ResNet-101      | 0.960             |
|              | ResNeXt-101     | 0.968             |
|              | RegNetX-3.2GF   | 0.966             |
|              | ResNest-50      | 0.973             |
|              | Res2Net-101     | <b>0.977</b>      |

**Supplementary Table 8: Storage tank detection model performance and dataset counts in the evaluation basins.**

| Basin          | Average Precision | Precision | Recall | # Positive Images | # Negative Images |
|----------------|-------------------|-----------|--------|-------------------|-------------------|
| Permian/Denver | 0.986             | 0.962     | 0.968  | 162               | 380               |
| Appalachian    | 0.505             | 0.517     | 0.550  | 405               | 222               |
| TX-LA-MS Salt  | 0.876             | 0.880     | 0.851  | 399               | 229               |
| Anadarko       | 0.960             | 0.935     | 0.939  | 520               | 72                |
| Uinta-Piceance | 0.943             | 0.904     | 0.906  | 461               | 83                |

**Supplementary Table 9. Deployment results of the best storage tank detection model.** The mean number of storage tanks per well pad was calculated across well pads containing storage tanks.

|         | Total # of Detected Storage Tanks | Total # of Well Pads with Detected Storage Tanks | Total # of Well Pads without Detected Storage Tanks | Mean # of Storage Tanks per Well Pad |
|---------|-----------------------------------|--------------------------------------------------|-----------------------------------------------------|--------------------------------------|
| Permian | 147,116                           | 35,077                                           | 159,896                                             | 4.194                                |
| Denver  | 28,880                            | 8,502                                            | 28,089                                              | 3.397                                |
| Overall | 175,996                           | 43,579                                           | 187,985                                             | 4.039                                |

**Supplementary Table 10. Dataset counts for the well pad detection task in the Permian and Denver basins.**

|         | Training          |                   | Validation        |                   | Testing           |                   |
|---------|-------------------|-------------------|-------------------|-------------------|-------------------|-------------------|
|         | # Positive Images | # Negative Images | # Positive Images | # Negative Images | # Positive Images | # Negative Images |
| Permian | 4,499             | 17,512            | 1,106             | 3,481             | 739               | 2,267             |
| Denver  | 2,987             | 17,275            | 638               | 3,545             | 463               | 2,433             |
| Other   | N/A               | 23,436            | N/A               | 4,599             | N/A               | 3,064             |

**Supplementary Table 11. Dataset counts for the storage tank detection task in the Permian and Denver basins.**

|         | Training          |                   | Validation        |                   | Testing           |                   |
|---------|-------------------|-------------------|-------------------|-------------------|-------------------|-------------------|
|         | # Positive Images | # Negative Images | # Positive Images | # Negative Images | # Positive Images | # Negative Images |
| Permian | 786               | 1,581             | 130               | 332               | 92                | 213               |
| Denver  | 632               | 1,080             | 123               | 229               | 70                | 167               |

### Permian Basin

### Denver Basin

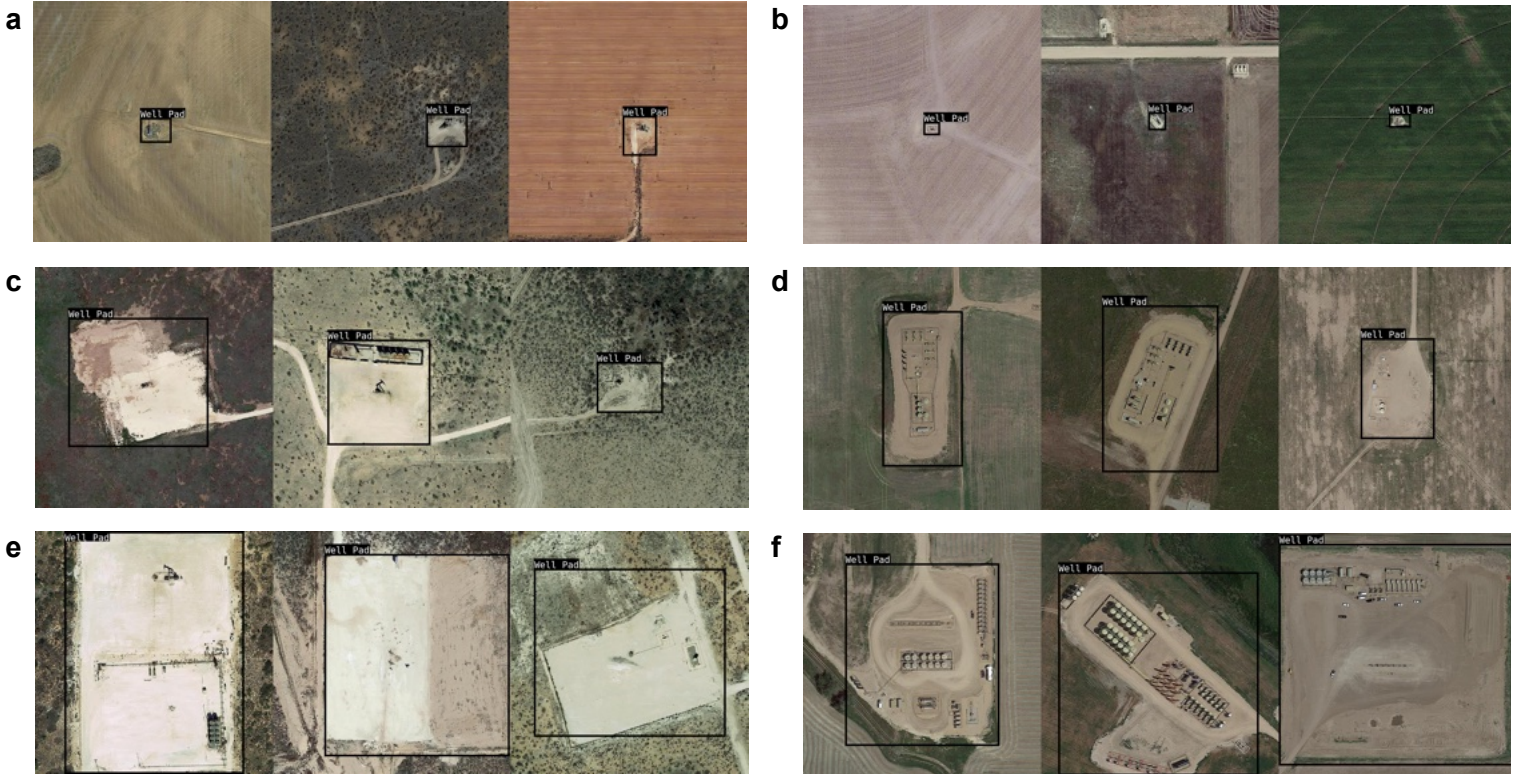

Map Data: Google, ©2013-2019

**Supplementary Fig. 1. Satellite imagery of well pads.** a,b Small (<41m<sup>2</sup>), c,d medium (41-164m<sup>2</sup>), and e,f large (>164m<sup>2</sup>) well pads with manually obtained annotations overlaid. Performance on small well pads is considerably lower than on medium and large-sized well pads in both basins, and is poorest on small well pads in the Denver basin, where there are few discernible features on single wellhead pads and a higher likelihood of incurring false positives.

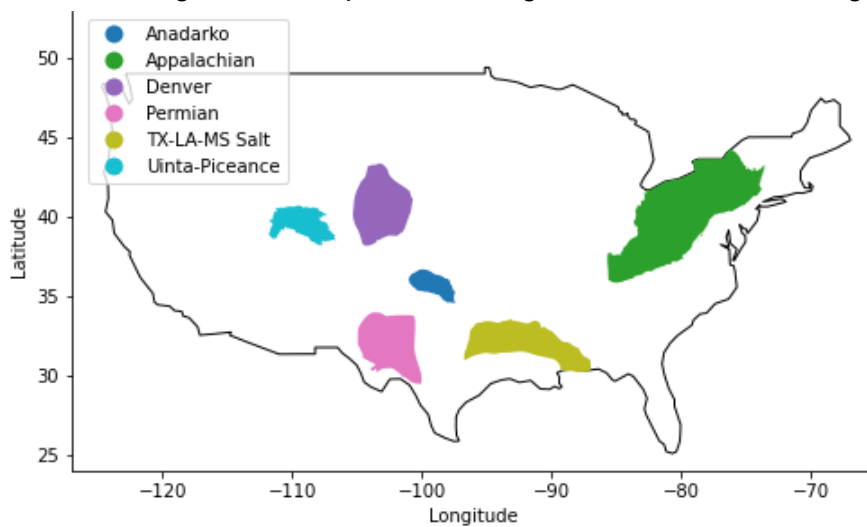

**Supplementary Fig. 2: Subset of high-producing sedimentary basins in the U.S.** The model was trained in the Permian and Denver basins, and evaluated in all basins shown here.



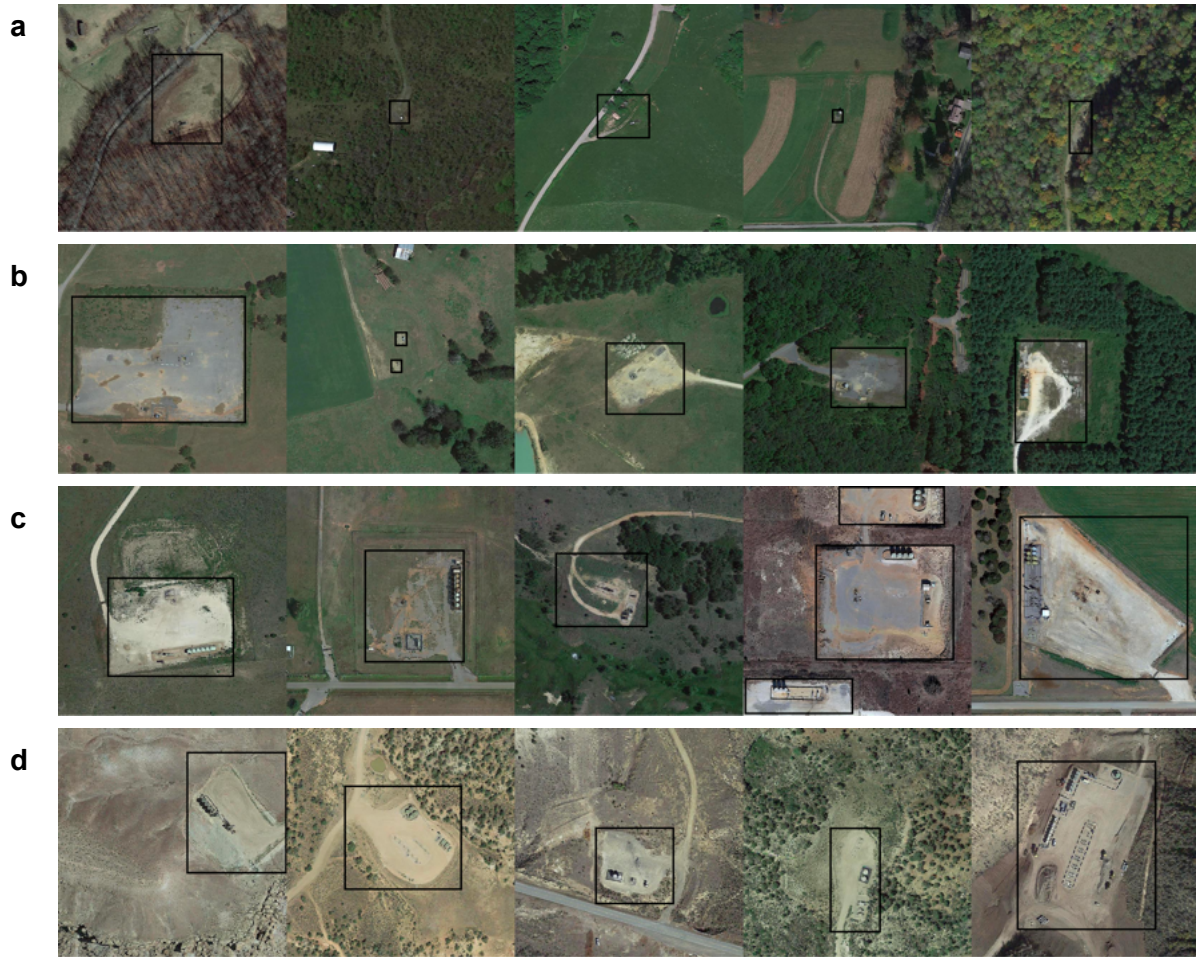

Map Data: Google, ©2013-2019

**Supplementary Fig. 3. Satellite imagery of well pads in evaluation basins.** The model was evaluated in the **a** Appalachian, **b** TX-LA-MS Salt, **c** Anadarko, and **d** Uinta-Piceance basins, which were unseen during training.



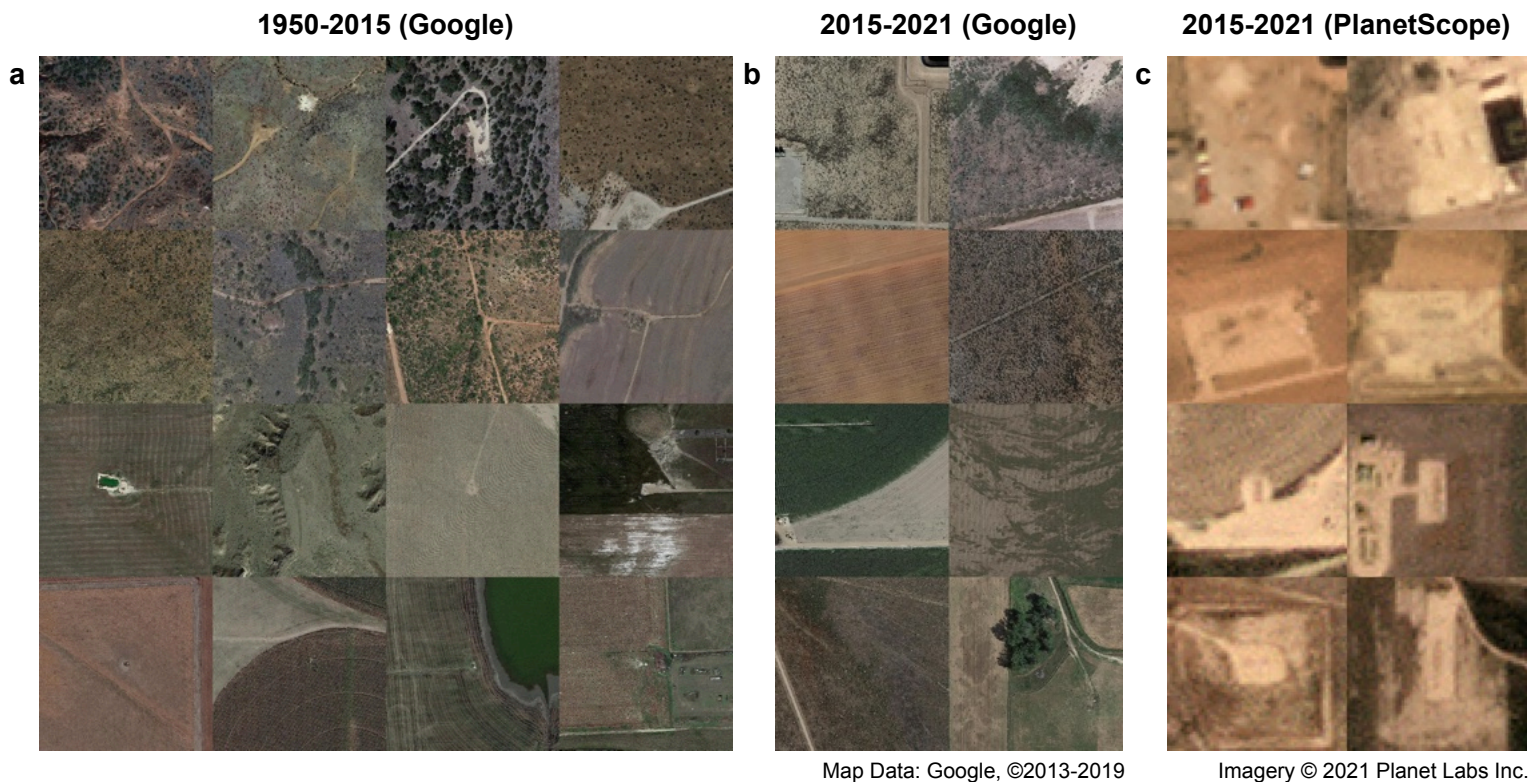

**Supplementary Fig. 4. Random sample of well pad locations from the Enverus dataset that were undetected by the model.** Well pads are shown from the Permian (top two rows) and Denver (bottom two rows) basins. **a** For the sample of well pads constructed from 1950-2015, the missed well pad locations primarily consist of small well pads and images with no visible well pad, indicating that the reported datasets include some data with inaccurate and/or outdated locations. **b** For the sample of well pads constructed from 2015-2021, the missed well pad locations also contain no visible well pad; however, these recent examples can be attributed to outdated imagery. **c** The same locations are shown with 2021 PlanetScope imagery, where well pads are clearly visible in the images.

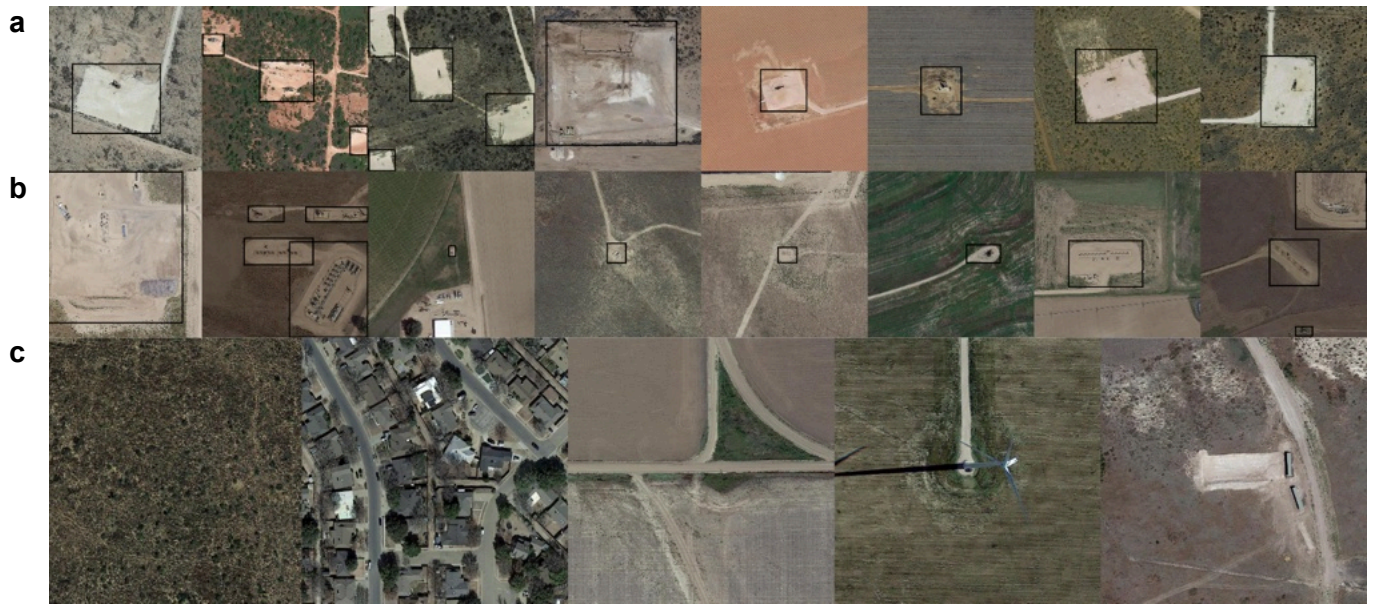

Map Data: Google, ©2013-2019

**Supplementary Fig. 5. Example satellite images in the training dataset.** Manually obtained well pad annotations used to train and evaluate the models are overlaid on the images in the **a** Permian and **b** Denver basins. **c** Example satellite images of negatives in both basins which were curated (from left to right) by random sampling within basin boundaries, within city boundaries, roads, wind turbines, and land use / land cover similar to well pads and surrounding landscapes collected using GeoVisual similarity search. Negative images are displayed larger for figure visualization but all images in the dataset are the same size.

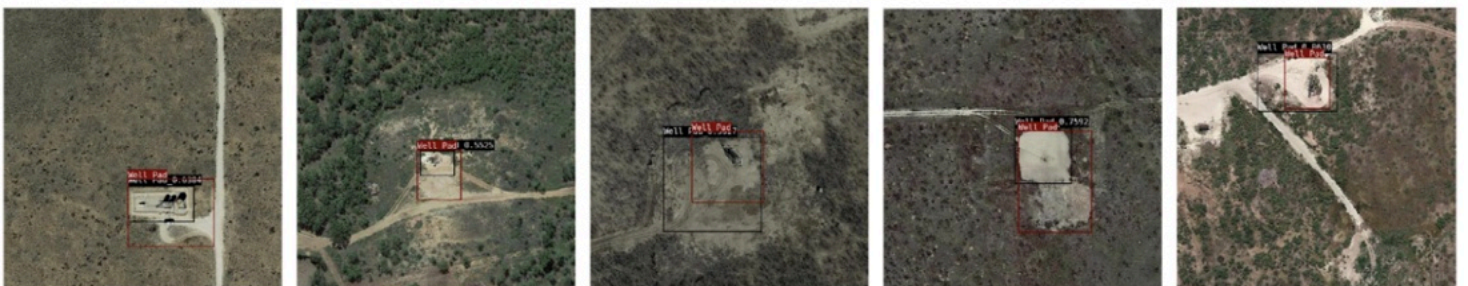

Map Data: Google, ©2013-2019

**Supplementary Fig. 6. Well pads with ground truth (red) and predicted (black) bounding boxes overlaid.** In each example the IoU is greater than 0.3 and less than 0.5. During model evaluation, we determined matches between predicted and ground truth bounding boxes using an IoU threshold of 0.3, a lower value than conventionally used for evaluation in object detection (which typically range from 0.5-0.95). We justified this choice based on the ambiguities in defining well pad boundaries for many well pads. The figure shows such examples, where the predictions show reasonable localizations of the well pads despite  $\text{IoU} < 0.5$ , which motivated our choice of the 0.3 IoU threshold.

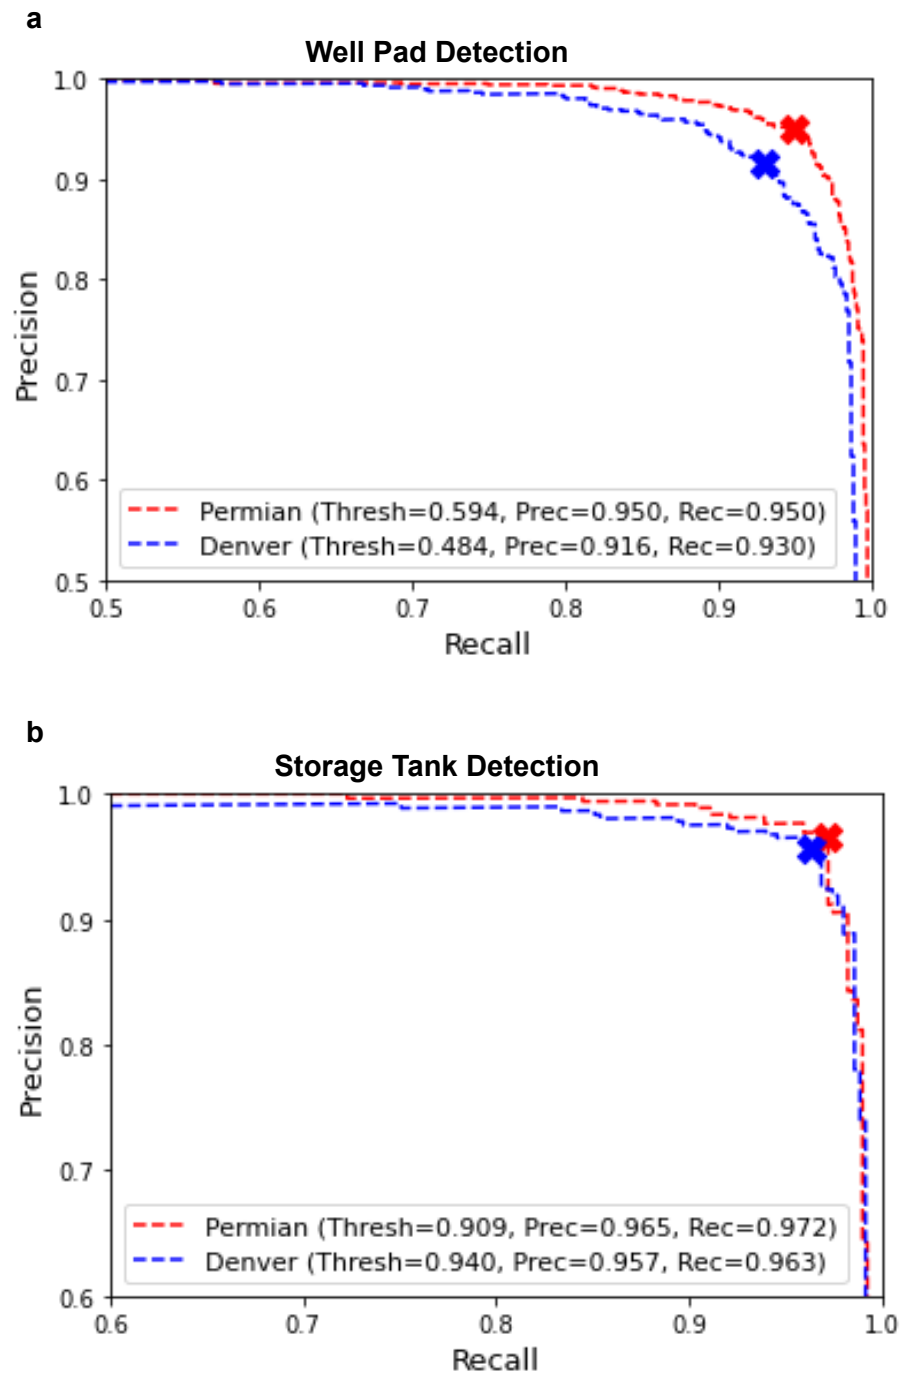

**Supplementary Fig. 7:** Precision-recall curve of the **a** well pad detection and **b** storage tank detection models in the Permian and Denver basins. The selected threshold value, and the corresponding precision and recall values, are shown in the legend.



**Permian Basin**

**Denver Basin**

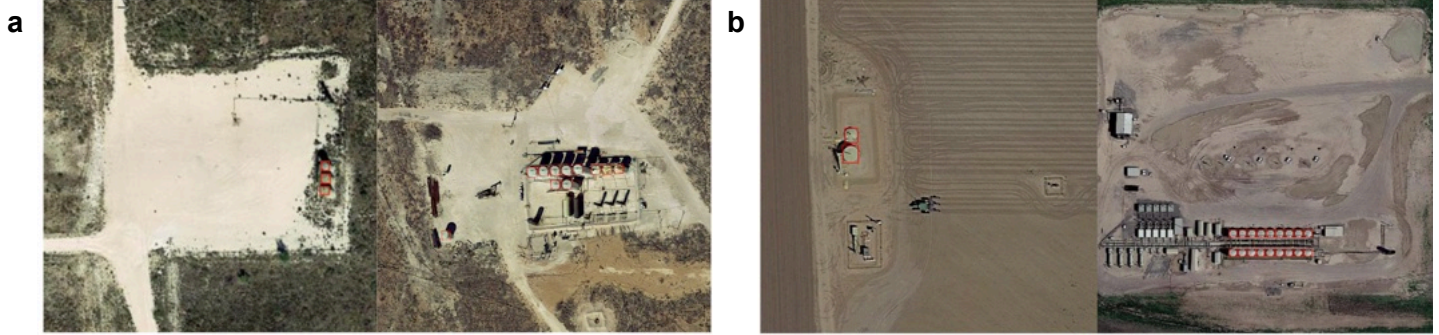

Map Data: Google, ©2013-2019

**Supplementary Fig. 8. Example satellite images of well pads with storage tanks.** Manually obtained storage tank annotation, shown in red, in the **a** Permian and **b** Denver basins were used to train and evaluate the models.

## Supplementary Note 1: Construction of Well Pad Datasets

To verify and evaluate model detections during deployment, we leveraged the HIFLD and Enverus (2021 version) well datasets. To match the *well* datasets to the *well pad* model detections, we first clustered the well datasets into well pads. We used DBSCAN, a spatial clustering algorithm, with parameters `min_samples` set to 1 and `eps` set to 50m. We considered each well cluster as a well pad, and chose the centroid of well coordinates as the well pad location.

Other well-level data were also aggregated. For most categorical variables (Well Type, Production Type, Operator, etc.) the mode value in the cluster was assigned to the well pad. Dates were assigned according to the semantic meaning of the variable (ie, the oldest date was selected for First Production Date, while the most recent date was chosen for Completion Date). Production-related variables, i.e. kBOE/d (only available in the Enverus dataset) were summed for the cluster. The active/inactive status of a well pad was determined as follows: For the Enverus dataset, if the mode Well Status (“ENVWellStatus”) was “PRODUCING” or “COMPLETED” and the summed kBOE/d (“kboed”) was greater than 0, the well pad was considered active. All other well pads were considered inactive. For the HIFLD dataset, if the mode Well Status (“STATUS”) was “PRODUCING WELL” or “ACTIVE WELL”, the well pad was considered active; all other well pads were considered inactive.

The Enverus and HIFLD well databases were clustered and well pad datasets formed independently. Because the former contained some locations not present in the latter, we also formed a joint dataset constructed as the union of the locations in both datasets (Enverus + HIFLD), with duplicates within 25m removed. The joint dataset was leveraged in particular for determining which model detections could be considered “new”.

**Supplementary Table 12:** Number of wells in the original Enverus and HIFLD datasets, as well as the number of well pads constructed using the methodology above.

|         |                 | # Wells<br>(Original database) | # Well pads<br>(Constructed database) |
|---------|-----------------|--------------------------------|---------------------------------------|
| Permian | Enverus         | 150,542                        | 134,039                               |
|         | HIFLD           | 190,797                        | 161,023                               |
|         | Enverus + HIFLD | 200,318                        | 183,325                               |
| Denver  | Enverus         | 22,148                         | 13300                                 |
|         | HIFLD           | 30,988                         | 24316                                 |
|         | Enverus + HIFLD | 37,308                         | 26285                                 |
